# Supplementary material for: Development of hybrid biomicroparticles: cellulose exposing functionalized fusion proteins
Source: Springer Nature journal article supplement (doi:10.1186/s12934-024-02344-x), 2024-03-14
Supplement: MOESM1 [file 12934_2024_2344_MOESM1_ESM-1.pdf]

## SUPPORTING INFORMATION

### **Development of hybrid biomicroparticles: cellulose exposing functionalized fusion proteins**

*Joanna Żebrowska<sup>1,2†\*</sup>, Piotr Mucha<sup>3†</sup>, Maciej Prusinowski<sup>1</sup>, Daria Krefft<sup>1,2</sup>, Agnieszka Żylicz-Stachula<sup>1,2</sup>, Milena Deptuła<sup>4</sup>, Aneta Skoniecka<sup>4</sup>, Agata Tymińska<sup>4</sup>, Małgorzata Zawrzykraj<sup>5</sup>, Jacek Zieliński<sup>6</sup>, Michał Pikula<sup>4</sup>, Piotr M. Skowron<sup>1,2</sup>*

<sup>1</sup> Department of Molecular Biotechnology, Faculty of Chemistry, University of Gdansk, Gdansk, 80-308, Poland

<sup>2</sup> BioVentures Institute Ltd., Poznan, 60-141, Poland

<sup>3</sup> Department of Molecular Biochemistry, Faculty of Chemistry, University of Gdansk, Gdansk, 80-308, Poland Laboratory of Tissue Engineering and Regenerative Medicine, Division of Embryology, Faculty of Medicine, Medical University of Gdansk, Gdansk, 80-211, Poland

<sup>4</sup> Laboratory of Tissue Engineering and Regenerative Medicine, Division of Embryology, Faculty of Medicine, Medical University of Gdansk, Gdansk, 80-211, Poland

<sup>5</sup> Division of Clinical Anatomy, Faculty of Medicine, Medical University of Gdansk, Gdansk, 80-211, Poland

<sup>6</sup> Department of Oncologic Surgery, Faculty of Medicine, Medical University of Gdansk, Gdansk, 80-211, Poland

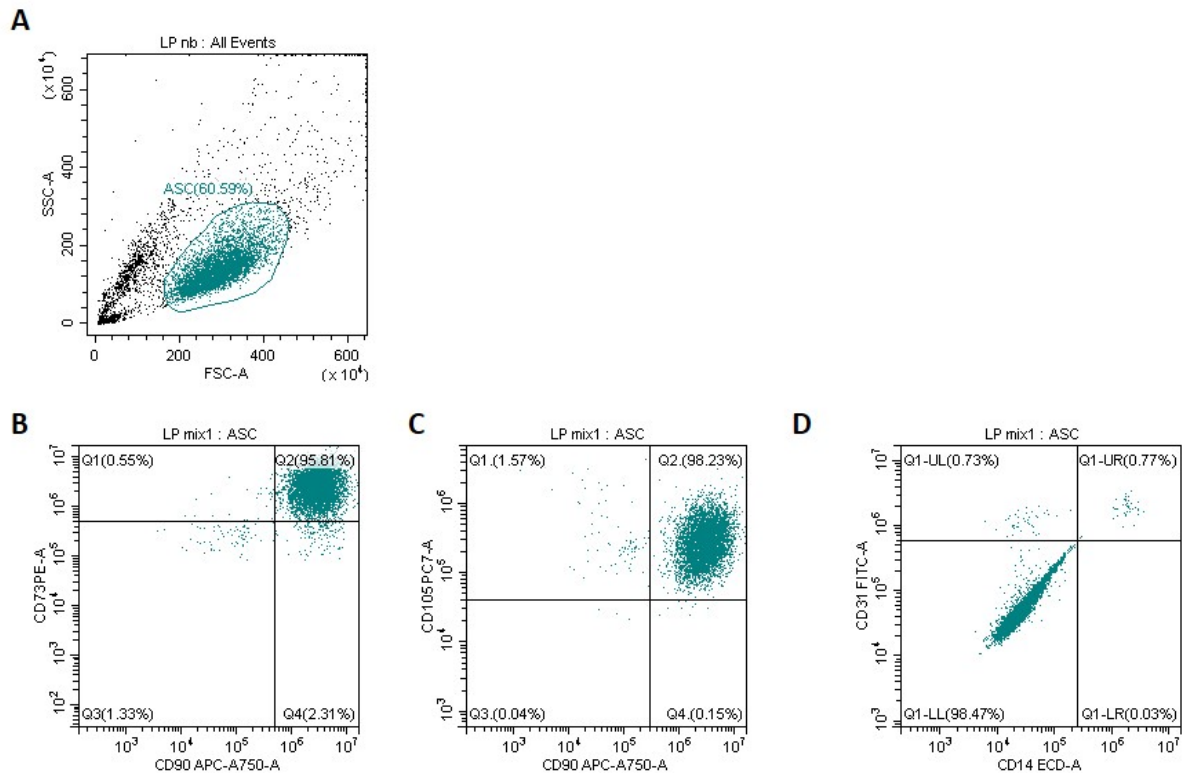

**Figure 1S.** The confirmation of ASCs immunophenotype. A flow cytometric analysis of the key positive and negative surface markers (according to ISCT guidelines) was conducted. (A), Representative dot plots with gated adipose-derived stem cells (ASC); (B), ASC cells with positive surface markers CD73+, CD90+ (95,81%); (C), and CD105+, CD90+ (98,23%); and (D), negative surface markers CD31-, CD14- (98,47%).

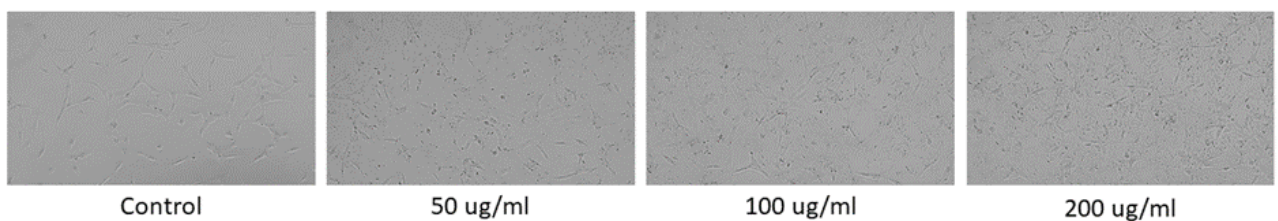

**Figure 2S.** Morphology of fibroblast cell lines. The cells (46BR.1N) were stimulated by MCC (24 h).

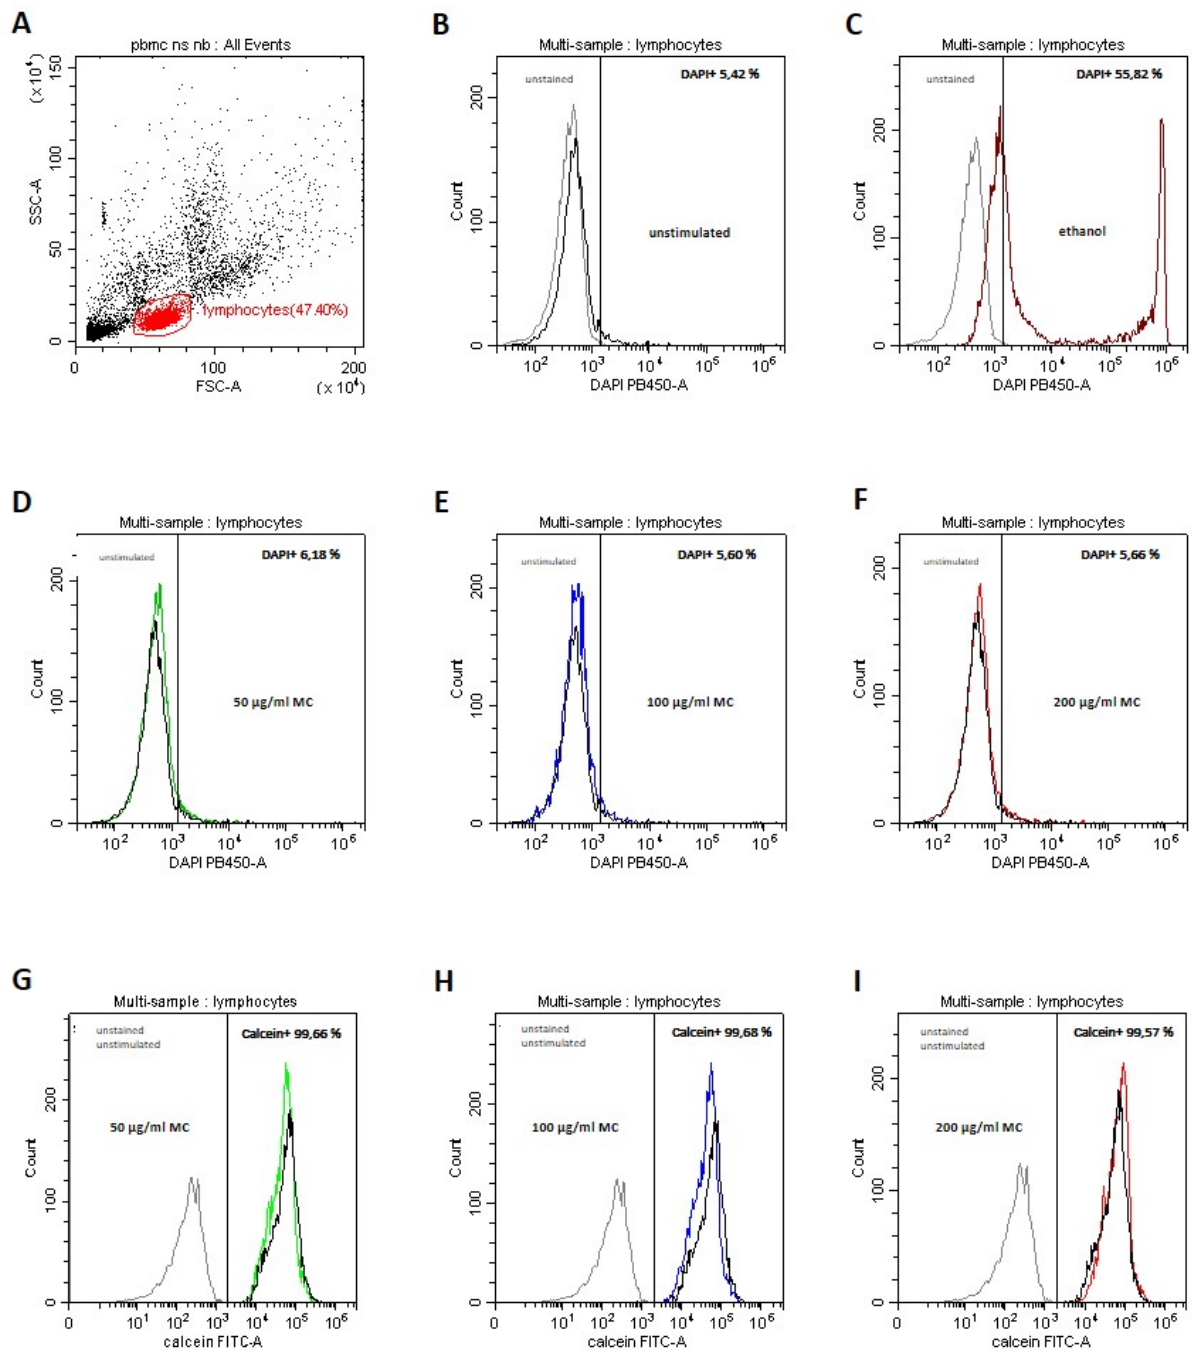

**Figure 3S.** Effect of the MCC on PBMC viability. This was checked by DAPI ( DAPI+ dead cells; B-F) and Calcein AM (alive cells; G-I) staining. Representative dot plot of PBMC with gated lymphocytes (A). Representative overlay histograms analysis of unstimulated and unstimulated cells (B), and DAPI-stained: ethanol-treated (C) as a positive control with dead cells. On histograms D-F, cells were stimulated by MCC in different concentrations (50 µg/ml – D (green line), 100 µg/ml – E (blue line), 200 µg/ml – F (red line)), and compared to the corresponding unstimulated sample. The histograms G-I show alive cells stained with Calcein AM stimulated by MCC (50 µg/ml – G (green line), 100 µg/ml – H (blue line), 200 µg/ml – I

(red line)), compared with the unstained and unstimulated sample. Obtained values refer to the gated lymphocytes area.

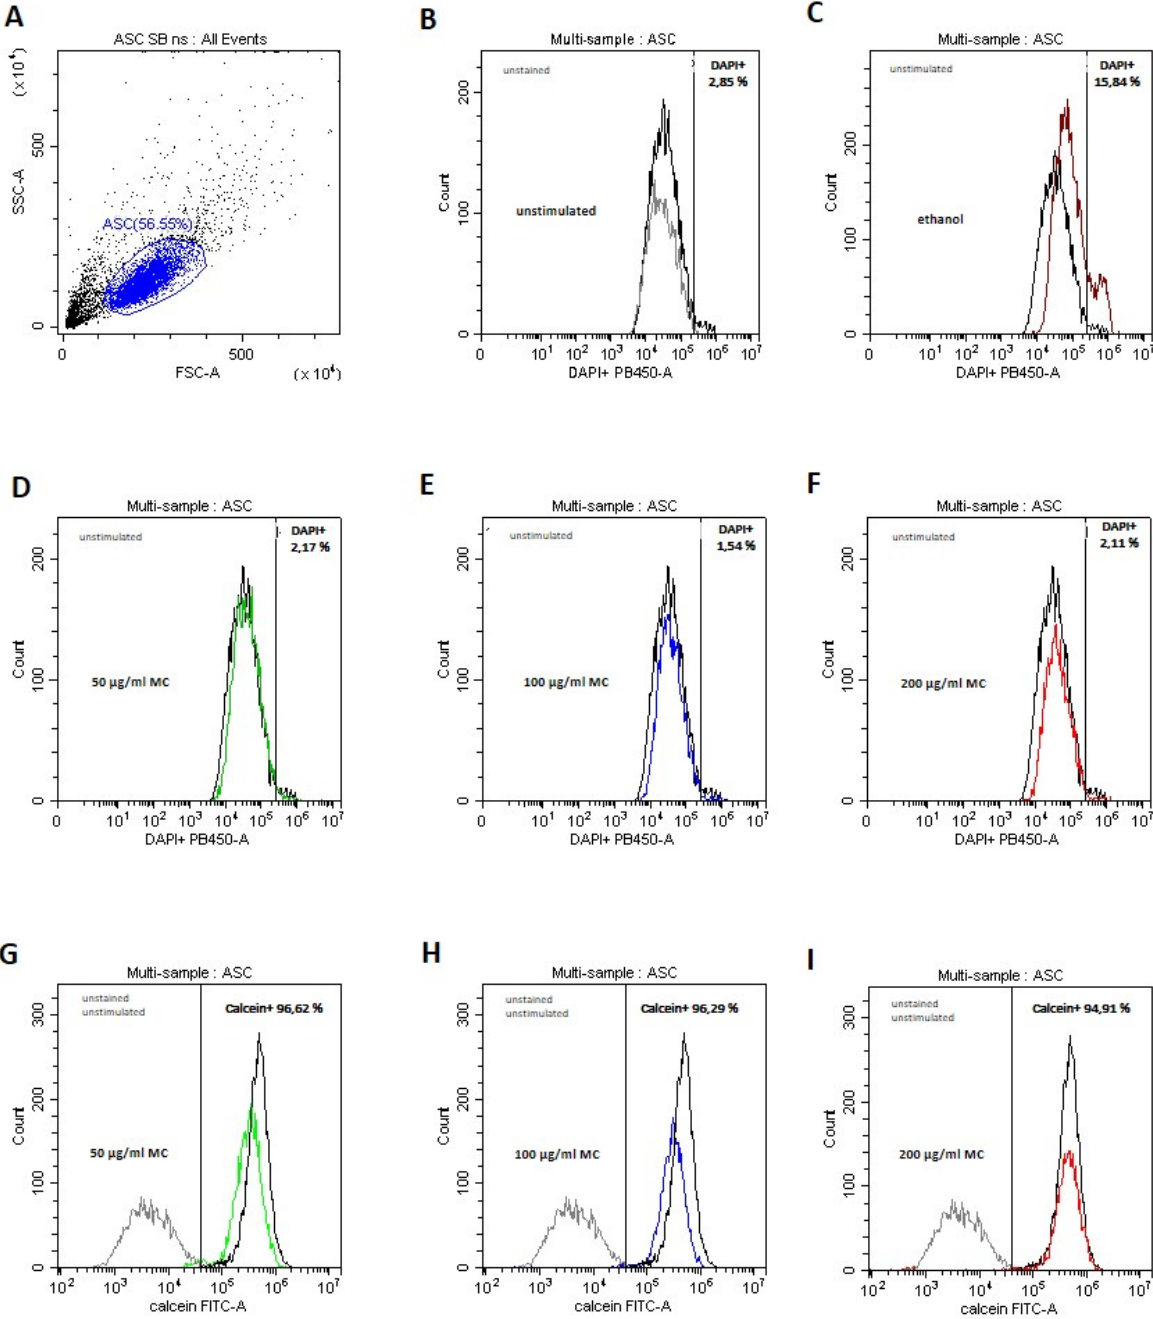

**Figure 4S.** Influence of the MCC on ASC viability. This was checked by DAPI (DAPI+ dead cells; B-F) and Calcein AM (Calcein+ alive cells; G-I) staining. Representative dot plot of gated ASCs (A). Representative overlay histograms analysis of unstained cells (B), and DAPI-stained: ethanol-treated (C) as a positive control with dead cells. On histograms D-F, cells were

stimulated by MCC in different concentrations (50  $\mu\text{g/ml}$  – D (green line), 100  $\mu\text{g/ml}$  – E (blue line), 200  $\mu\text{g/ml}$  – F (red line)), and compared to the corresponding unstimulated sample. The histograms G-I show alive cells stained with Calcein AM –stimulated by MCC (50  $\mu\text{g/ml}$  – G (green line), 100  $\mu\text{g/ml}$  – H (blue line), 200  $\mu\text{g/ml}$  – I (red line)), compared with the unstained and unstimulated samples. Obtained values refer to the gated ASCs area.

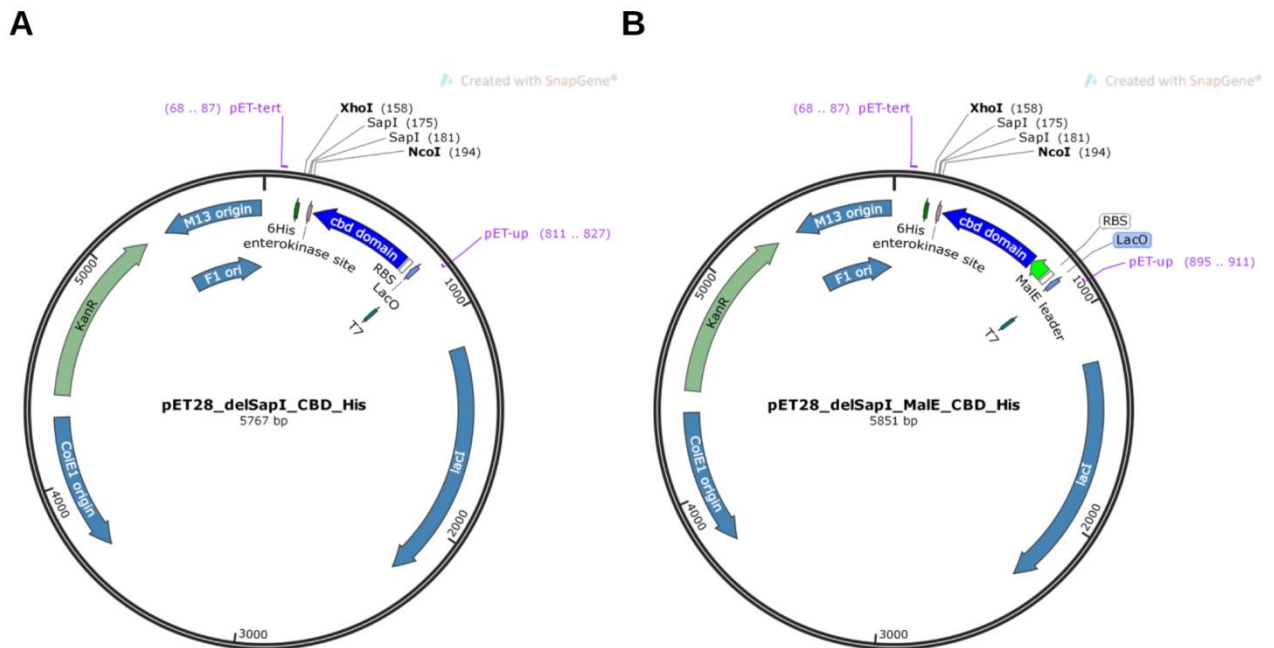

**Figure 5S.** New plasmid vector maps. Panel A. pET28\_delSapI\_CBD\_His. Panel B. pET28\_delSapI\_MalE\_CBD\_His.

**A**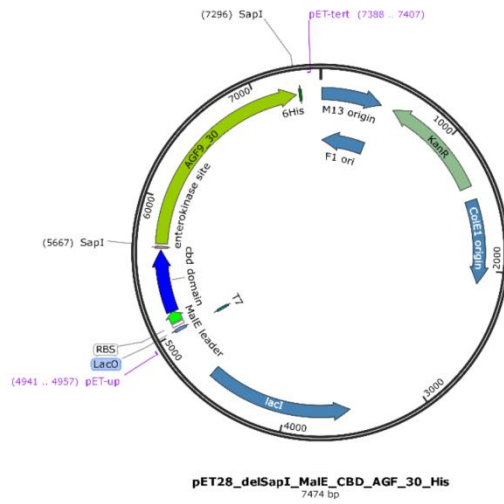**B**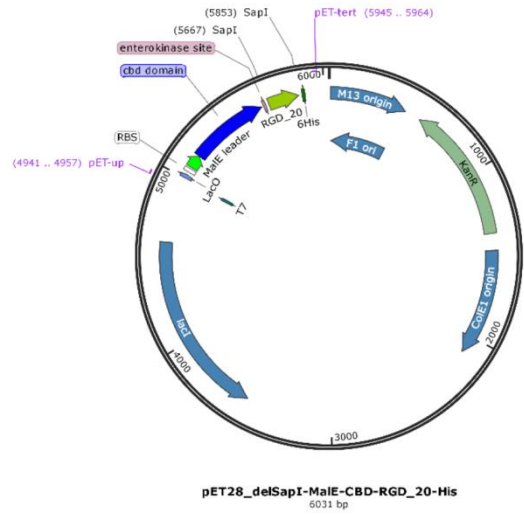

**Figure 6S.** New plasmid maps with AGF\_poliepitopic and RGD\_poliepitopic proteins. Panel A. Map of pET28\_delSapI\_MalE\_CBD\_AGF\_30\_His. Panel B. Map of pET28\_delSapI\_MalE\_CBD\_RGD\_20\_His.
